# Supplementary material
Source: PubMed Central journal article supplement (PMC9386608)
Supplement: jamadermatol-e223025-s001.pdf [file jamadermatol-e223025-s001.pdf]

## Supplemental Online Content

Reyes-Hadsall S, Drake L, Han JJ, et al. Shared decision-making, therapeutic choice, and decisional regret in patients with alopecia areata. *JAMA Dermatol*. Published online August 17, 2022. doi:10.1001/jamadermatol.2022.3025

**eTable 1.** Survey instrument

**eTable 2.** SDMQ9 responses

**eTable 3.** Correlation between components of SDM and decisional regret for last AA treatment decision made

**eTable 4.** Decisional regret regarding last AA treatment decision made

This supplemental material has been provided by the authors to give readers additional information about their work.

**eTable 1: Survey instrument**

| <b>Section 1: Baseline Characteristics</b>                                                                                        |                                                                                                                         |
|-----------------------------------------------------------------------------------------------------------------------------------|-------------------------------------------------------------------------------------------------------------------------|
| <b>Demographics</b>                                                                                                               | Age<br>Sex<br>Race<br>Ethnicity                                                                                         |
| <b>AA Participant Characteristics</b>                                                                                             | Years with Alopecia Areata (AA)<br>History of Alopecia Totalis (AT)<br>Current active hair loss<br>Last treatment used  |
| <b>Section 2: Decision-Making</b>                                                                                                 |                                                                                                                         |
| <b>Patient preferences in decision-making</b><br>(Select one out of the five statements)                                          | I prefer my doctor makes the final selection about which treatment I will receive                                       |
|                                                                                                                                   | I prefer that my doctor and I share responsibility for deciding which treatment is best for me                          |
|                                                                                                                                   | I prefer that my doctor makes the final decision about which treatment will be used, but seriously considers my opinion |
|                                                                                                                                   | I prefer to make the final selection about which treatment I will receive                                               |
|                                                                                                                                   | I prefer to make the final selection of my treatment after seriously considering my doctor's opinion                    |
| <b>How patients perceived last decision was made</b><br>(Select one out of three options)                                         | By my doctor                                                                                                            |
|                                                                                                                                   | By myself                                                                                                               |
|                                                                                                                                   | With a doctor                                                                                                           |
| <b>Section 3: Shared Decision-Making</b>                                                                                          |                                                                                                                         |
| <b>Validated SDM9</b><br>(6-point Likert scale for each statement ranging from "completely agree" to "completely disagree")       | My doctor made clear that a decision needs to be made                                                                   |
|                                                                                                                                   | My doctor wanted to know exactly how I wanted to be in making the decision                                              |
|                                                                                                                                   | My doctor told me that there are different options for treating my medical condition                                    |
|                                                                                                                                   | My doctor precisely explained the advantages and disadvantages of the treatment options                                 |
|                                                                                                                                   | My doctor helped me understand all the information                                                                      |
|                                                                                                                                   | My doctor asked me which treatment option I prefer                                                                      |
|                                                                                                                                   | My doctor and I thoroughly weight the different treatment options                                                       |
|                                                                                                                                   | My doctor and I selected a treatment option together                                                                    |
| My doctor and I reached an agreement on how to proceed                                                                            |                                                                                                                         |
| <b>Section 4: Decisional Regret Assessment</b>                                                                                    |                                                                                                                         |
| <b>Validated Decisional Regret Scale (DRS)</b><br>(For each statement, select Agree, Neutral, or Disagree [3-point Likert scale]) | It was the right decision                                                                                               |
|                                                                                                                                   | I regret the choice that was made                                                                                       |
|                                                                                                                                   | I would go for the same choice if I had to do it over again                                                             |
|                                                                                                                                   | The choice did me a lot of harm                                                                                         |

|  |                             |
|--|-----------------------------|
|  | The decision was a wise one |
|--|-----------------------------|

**eTable 2. SDM Q9 responses**

|                                                                                                | <b>Completely agree, n(%)</b> | <b>Strongly agree, n(%)</b> | <b>Somewhat agree, n(%)</b> | <b>Somewhat disagree, n(%)</b> | <b>Strongly disagree, n(%)</b> | <b>Completely disagree, n(%)</b> |
|------------------------------------------------------------------------------------------------|-------------------------------|-----------------------------|-----------------------------|--------------------------------|--------------------------------|----------------------------------|
| <i>My doctor made clear that a decision needs to be made</i>                                   | 123 (11.5)                    | 104 (9.7)                   | 218 (20.3)                  | 166 (15.5)                     | 147 (13.7)                     | 316 (29.4)                       |
| <i>My doctor wanted to know exactly how I wanted to be involved in making the decision</i>     | 243 (22.6)                    | 219 (20.4)                  | 211 (19.6)                  | 139 (12.9)                     | 85 (7.9)                       | 177 (16.5)                       |
| <i>My doctor told me that there are different options for treatment my medical condition</i>   | 252 (23.5)                    | 214 (19.9)                  | 245 (22.8)                  | 128 (11.9)                     | 87 (8.1)                       | 148 (13.8)                       |
| <i>My doctor precisely explained the advantages and disadvantages of the treatment options</i> | 239 (22.3)                    | 233 (21.7)                  | 258 (24.0)                  | 125 (11.6)                     | 89 (8.3)                       | 130 (12.1)                       |
| <i>My doctor helped me understand all the information</i>                                      | 250 (23.3)                    | 220 (20.5)                  | 273 (25.4)                  | 129 (12.0)                     | 81 (7.6)                       | 121 (11.3)                       |
| <i>My doctor asked me which treatment option I prefer</i>                                      | 254 (23.6)                    | 240 (22.3)                  | 223 (20.8)                  | 121 (11.3)                     | 86 (8.0)                       | 150 (14.0)                       |
| <i>My doctor and I thoroughly weighed the different treatment options</i>                      | 211 (19.6)                    | 187 (17.4)                  | 219 (20.4)                  | 166 (15.5)                     | 129 (12.0)                     | 162 (15.1)                       |
| <i>My doctor and I selected a treatment option together</i>                                    | 205 (19.1)                    | 210 (19.6)                  | 273 (25.4)                  | 125 (11.6)                     | 103 (9.6)                      | 158 (14.7)                       |

**eTable 3. Correlation between components of SDM and decisional regret for last AA treatment decision made**

| <b>Completely agree with item of SDM Q9, n (%)</b>           | <b>DRS: I would go for the same choice if I had to do it over again</b> |                 |                |                |
|--------------------------------------------------------------|-------------------------------------------------------------------------|-----------------|----------------|----------------|
|                                                              | <b>Agree</b>                                                            | <b>Disagree</b> | <b>Neutral</b> | <b>P value</b> |
| <i>My doctor made clear that a decision needs to be made</i> | 76 (61.8)                                                               | 23 (18.7)       | 24 (19.5)      | 0.3            |

|                                                                                                |            |           |           |       |
|------------------------------------------------------------------------------------------------|------------|-----------|-----------|-------|
| <i>My doctor wanted to know exactly how I wanted to be in making the decision</i>              | 148 (60.9) | 41 (16.9) | 54 (22.2) | 0.001 |
| <i>My doctor told me that there are different options for treating my medical condition</i>    | 174 (69.0) | 22 (8.7)  | 56 (22.2) | 0.001 |
| <i>My doctor precisely explained the advantages and disadvantages of the treatment options</i> | 164 (68.6) | 26 (10.9) | 49 (20.5) | 0.001 |
| <i>My doctor helped me understand all the information</i>                                      | 169 (67.6) | 30 (12.0) | 51 (20.4) | 0.001 |
| <i>My doctor asked me which treatment option I prefer</i>                                      | 172 (67.7) | 23 (9.1)  | 59 (23.2) | 0.001 |
| <i>My doctor and I thoroughly weight the different treatment options</i>                       | 143 (67.8) | 20 (9.5)  | 48 (22.7) | 0.001 |
| <i>My doctor and I selected a treatment option together</i>                                    | 139 (67.8) | 27 (13.2) | 39 (19.0) | 0.001 |
| <i>My doctor and I reached an agreement on how to proceed</i>                                  | 182 (69.5) | 33 (12.6) | 47 (17.9) | 0.001 |

**eTable 4. Decisional regret regarding last AA treatment decision made**

|                                                                           | <b><i>Disagree , n(%)</i></b> | <b><i>Neutral , n(%)</i></b> | <b><i>Agree , n(%)</i></b> |
|---------------------------------------------------------------------------|-------------------------------|------------------------------|----------------------------|
| <b><i>It was the right decision</i></b>                                   | 123 (11.5)                    | 392 (36.5)                   | 559 (52.0)                 |
| <b><i>I regret the choice that was made</i></b>                           | 709 (66.0)                    | 251 (23.4)                   | 114 (10.6)                 |
| <b><i>I would go for the same choice if I had to do it over again</i></b> | 229 (21.3)                    | 299 (27.8)                   | 546 (50.8)                 |
| <b><i>The choice did me a lot of harm</i></b>                             | 796 (74.1)                    | 216 (20.1)                   | 62 (5.8)                   |
| <b><i>The decision was a wise one</i></b>                                 | 115 (10.7)                    | 423 (39.4)                   | 536 (50.0)                 |
